# Supplementary material for: Transitional Probabilities for Plastic Waste Management and Implication on Sustainability
Source: Research Square preprint supplement (doi:10.21203/rs.3.rs-1507266/v1), 2022-04-04
Supplement: Supplementary file 1 [file 98fd658b926412b2c22413d3.docx]

**Transitional Probabilities for Plastic Waste Management and Implication on Sustainability**

**Environmental Management**

John A. Addor 1,2, Eric N. Wiah 2, and Felix I. Alao 3

1 Department of Mathematics, Statistics and Actuarial Science, Takoradi Technical University, Sekondi-Takoradi, P. O. Box 256, Ghana.

2 Department of mathematical Sciences, University of Mines and Technology, Tarkwa, P. O. Box 237, Ghana.

3 Department of Mathematical Sciences, School of Sciences, The Federal University of Technology, Akure, Ondo State, PMB 704, Nigeria.

Correspondence should be addressed to: [john.addor@ttu.edu.gh](mailto:john.addor@ttu.edu.gh)
